# Supplementary material for: The Destructive Effect of Ingroup Competition on Ingroup Favoritism
Source: Front Psychol. 2018 Nov 23;9:2207. doi: 10.3389/fpsyg.2018.02207 (PMC6265441; doi:10.3389/fpsyg.2018.02207)
Supplement: DATA SHEET S1 — Data from study 1. [file Data_Sheet_1.xls]

## Sheet: The data of participants
Intragroup competition	Anonymous DS	Public DS		FAV Anonymous	FAV Public	MJP Anonymous	MJP Public		MD Anonymous	MD Public	MIP/MJP Anonymous	MIP/MJP Public	Perceived intragroup competition	Perceived reciprocal interdependence
1	-32	-32		4	-3	8	-5		-1	4	-1	-2	5	2
1	-43	-36		8	0	0	-10		11	10	-1	-2	6	5
1	31	39		-1	-3	1	-3		-9	-3	3	1	4	5
1	0	104		-5	-4	5	4		-4	2	-8	-10	7	1
1	-98	-98		5	5	3	1		0	4	0	4	5	3
1	-80	-35		0	12	0	0		0	6	0	6	5	3
1	-8	2		-12	-12	0	0		0	0	-12	-12	6	2
1	-98	-98		-12	-5	0	3		0	-2	-12	-4	6	2
1	98	98		0	0	0	0		0	0	0	0	5	5
1	-10	-22		-12	-12	0	0		0	0	-12	-12	7	1
1	-22	0		12	12	0	0		0	0	12	12	7	4
1	44	35		0	-1	-2	-5		2	1	-6	-3	6	2
1	-72	-62		-2	0	0	0		-6	0	0	0	5	3
1	38	-3		5	3	-1	1		9	6	1	-2	5	5
1	-25	-2		-9	-7	1	1		-1	-1	-11	-9	6	4
1	40	83		12	0	0	0		-12	3	0	-3	6	4
1	-98	-36		-5	0	-1	0		0	0	-4	0	3	5
1	6	4		5	7	1	-1		-1	12	11	0	2	3
1	12	51		-12	0	0	-12		0	0	-12	-12	7	7
1	-98	-98		0	0	-2	-2		0	4	-2	-2	5	3
1	14	4		-2	9	-6	3		6	10	6	-2	5	1
1	-69	2		-12	-12	0	0		0	0	-12	-12	6	2
1	4	-2		4	0	-2	0		0	2	0	-2	6	2
1	5	2		8	0	0	0		-1	0	-9	0	5	5
1	7	0		0	0	0	0		0	0	0	-12	1	1
1	-6	-10		-1	0	1	0		0	0	-2	0	2	1
1	-67	-74		0	0	0	2		1	0	1	0	2	2
1	-7	-62		-1	-1	-1	1		-1	-1	1	-1	5	6
1	-40	2		-8	-9	-2	3		3	-3	-9	-9	5	2
1	-96	-98		-3	0	3	12		2	0	-2	-12	6	6
1	-93	-43		0	0	-12	-12		0	0	-12	-12	5	1
1	-22	-20		-12	-12	0	0		0	0	-12	-12	6	5
1	-6	-26		-11	-8	-1	4		0	1	-10	-5	6	2
1	-10	10		-1	0	-1	-2		-3	2	1	-6	5	3
1	98	98		-1	-2	-1	-2		1	-2	-1	-2	5	2
1	5	-21		-2	0	2	0		2	-2	-2	2	6	3
1	85	56		12	12	0	0		0	0	12	12	1	6
1	-12	-8		1	6	-1	-6		1	0	-9	-12	5	5
1	-98	-98		-12	-12	0	0		0	0	-12	-12	6	1
1	-16	-3		-2	-1	0	-3		-2	-2	0	-4	3	3
1	-59	16		-5	2	-5	0		0	2	-12	0	6	1
1	13	-22		-1	-9	-5	3		6	-3	-2	3	7	2
1	94	0		1	0	1	0		2	0	-2	0	5	2
1	3	54		-4	-3	-2	-9		0	0	4	-12	5	2
1	-82	-94		1	0	0	0		0	2	2	0	5	2
1	3	-37		-1	-2	-1	0		-1	-2	-1	0	2	2
1	-6	2		12	0	0	-12		0	0	12	-12	6	4
1	64	43		2	2	2	0		6	-5	0	-1	5	2
1	-98	-98		4	0	4	0		-5	3	3	-5	2	4
1	19	14		-12	0	0	0		0	0	-12	0	7	7
1	-107	-2		10	0	0	0		12	0	0	0	2	2
1	-71	-84		0	4	0	0		1	8	1	4	2	6
1	-25	-28		-7	-12	-1	0		-3	-1	-9	-11	6	2
1	12	-12		3	-3	1	1		-6	-6	-4	-2	2	2
1	8	-2		2	0	0	0		0	0	0	0	2	2
1	-98	-98		6	10	6	2		6	0	-2	2	5	6
1	8	-10		-12	-12	0	0		0	0	-12	-12	6	6
1	-98	-98		0	0	12	0		-1	0	11	0	6	2
1	3	0		-12	0	0	0		-9	0	3	12	5	4
1	-2	-49		-12	-12	0	0		0	0	-12	-12	7	6
1	-1	8		2	2	2	2		1	2	1	2	5	5
1	-2	-18		7	2	-3	-2		4	1	0	-3	6	5
1	98	-2		6	3	6	1		6	0	6	12	4	1
1	10	7		-12	12	0	0		-10	-6	0	-6	5	1
1	41	13		-1	1	-9	1		6	6	6	4	2	2
1	-98	-2		-8	-10	4	0		-1	0	-7	-12	6	2
1	-98	-98		-6	-5	-6	-1		-1	3	1	-3	5	3
1	15	18		12	12	0	0		0	12	12	0	5	1
1	47	7		1	2	-3	4		-1	-4	1	0	5	3
1	26	19		0	0	0	0		0	-1	0	-1	3	2
1	-52	92		1	0	1	0		-1	-2	1	0	5	6
1	31	33		-12	-12	0	0		0	0	-12	-12	5	2
1	2	1		-2	-2	-4	2		0	-4	0	-4	7	2
1	-4	-16		-12	-12	0	0		0	0	-12	-12	6	2
2	21	36		-6	2	-6	-10		-10	0	-2	-12	6	1
2	82	110		0	0	0	0		0	0	12	12	5	6
2	-61	7		0	0	0	0		0	0	0	0	3	1
2	36	98		0	3	0	-3		5	5	5	5	2	2
2	-29	-25		6	12	-6	0		6	12	6	0	1	1
2	56	94		-12	6	0	-6		-1	7	-1	5	6	2
2	99	0		0	12	12	0		0	0	12	12	3	3
2	6	-1		-3	-2	1	0		-6	-5	0	1	2	1
2	82	85		11	11	1	-1		1	1	-11	-3	6	2
2	-2	-1		12	0	0	0		1	0	11	0	2	2
2	27	1		0	1	0	-1		0	0	0	2	3	2
2	-2	28		11	10	1	0		9	1	1	9	6	5
2	7	14		-6	0	6	0		0	-5	12	7	2	2
2	60	66		9	3	-3	-3		0	2	-12	2	2	2
2	70	36		0	6	0	-6		0	0	-12	12	2	2
2	0	-2		10	12	0	0		6	0	6	12	2	3
2	0	0		6	5	0	7		0	0	12	12	4	5
2	-10	-2		1	0	-3	-2		2	1	-4	1	5	4
2	-2	8		0	0	12	12		0	0	12	12	2	2
2	44	-4		4	-4	0	0		3	-4	5	0	3	5
2	-48	20		5	-1	-5	11		1	9	11	3	6	7
2	2	2		0	0	12	12		0	0	12	12	2	2
2	0	-2		-5	3	1	5		1	1	7	-1	2	2
2	82	98		-2	0	2	2		3	4	-1	0	3	3
2	80	65		8	8	2	-2		0	2	10	10	6	3
2	9	1		8	3	0	-3		2	5	8	3	4	2
2	22	-8		0	0	0	0		0	0	0	0	2	2
2	29	-4		0	0	0	0		0	0	0	2	3	4
2	50	52		0	1	0	-11		0	-1	-12	-11	5	5
2	26	2		0	0	0	12		0	0	0	12	1	1
2	-18	16		6	0	6	12		0	0	12	12	6	3
2	50	0		-5	-4	1	2		-2	5	-2	-7	5	4
2	26	41		12	0	0	0		0	0	12	0	1	1
2	-14	-31		2	4	0	0		4	5	0	1	5	2
2	0	0		-1	-4	-1	0		-3	1	-3	-7	2	2
2	18	-35		12	12	0	0		0	0	12	12	6	5
2	-98	-98		0	0	0	0		0	0	12	12	5	5
2	-80	-17		-4	-7	-2	5		6	4	6	-8	5	2
2	21	109		-12	-12	0	0		0	0	-12	-12	4	2
2	0	1		4	6	0	0		2	8	2	0	2	2
2	0	6		-3	0	1	-2		-3	-2	-1	0	3	5
2	-38	0		0	4	0	0		0	5	0	1	3	2
2	78	89		6	1	6	11		0	0	12	12	2	2
2	-14	24		-2	0	2	0		0	0	-12	-12	6	2
2	7	7		0	12	0	0		0	0	12	12	2	2
2	16	11		1	1	1	-1		1	0	1	-8	3	1
2	-46	-31		1	1	-1	1		0	-2	0	2	2	2
2	12	26		12	12	0	0		4	8	8	4	5	2
2	30	11		3	-1	-1	-1		3	-5	-3	-1	2	2
2	110	2		12	10	0	2		6	3	6	3	3	1
2	-23	-17		-10	-3	-2	-3		0	6	0	6	2	2
2	64	70		0	12	0	0		5	11	7	1	3	3
2	-6	-6		0	-2	0	0		-2	-1	0	-1	5	2
2	2	41		0	0	0	0		0	6	12	6	6	3
2	34	27		0	0	0	0		0	0	12	12	1	1
2	-16	2		8	10	2	2		0	1	12	1	3	2
2	0	98		-2	2	-2	-2		0	0	12	12	5	2
2	6	5		3	3	3	-1		0	0	12	0	2	5
2	5	9		2	2	0	0		2	-5	0	7	5	2
2	100	106		-9	-1	3	5		5	2	-7	-8	6	2
2	22	-18		2	2	-10	-10		0	4	-8	-8	4	4
2	104	67		8	-2	-2	2		12	5	0	-3	3	2
2	98	98		12	0	0	0		12	0	0	0	5	2
2	27	34		0	0	0	0		-2	-1	10	10	2	3
2	26	24		12	0	0	0		0	1	12	12	3	2
